# Supplementary material for: Towards a better integration of palliative care in oncology? A multicentric cross-sectional study
Source: Research Square preprint supplement (doi:10.21203/rs.3.rs-7021025/v1), 2025-07-31
Supplement: Supplementary file 1 [file a336b3cdcf83875b8064aaa6.docx]

**SUPPLEMENTARY MATERIAL**


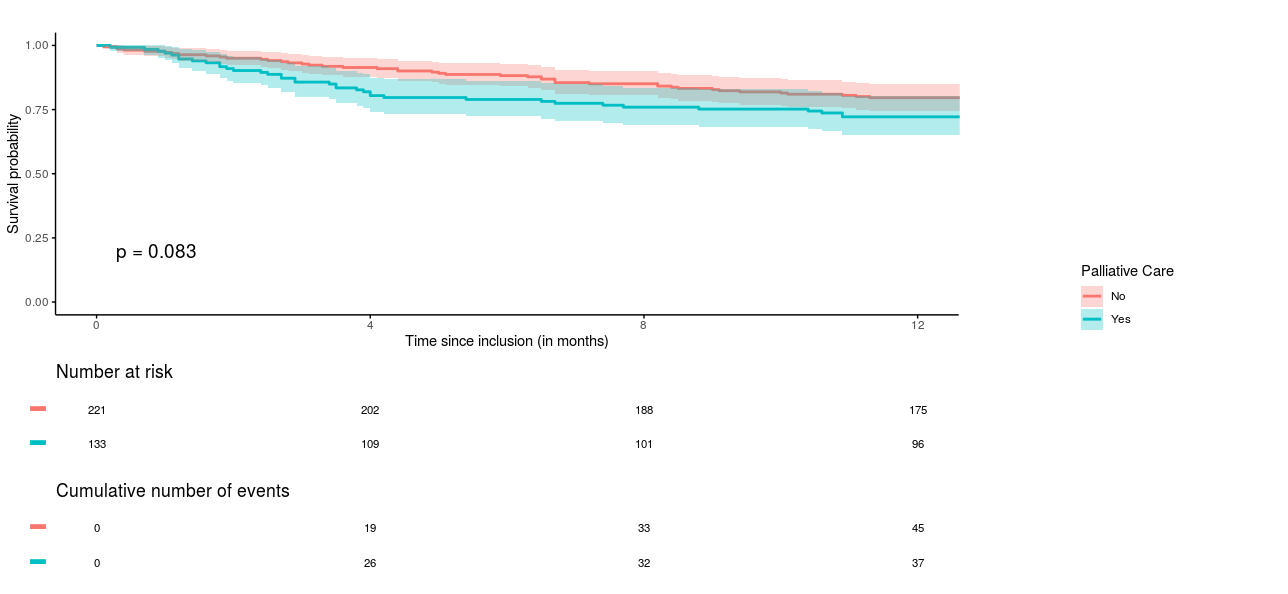


Figure 1- Comparison of one-year survival between patients who had met or not a palliative care team at inclusion.
